# Supplementary material for: Delivery of liquid metal particles and tanshinone IIA into the pericardial cavity for myocardial infarction treatment
Source: Royal Society of Chemistry journal article supplement (doi:10.1039/d4tb01274g), 2024-01-01
Supplement: d4tb01274g1.pdf [file d4tb01274g1.pdf]

## Supporting information

### Delivery of liquid metal particles and tanshinone IIA into the pericardial cavity for myocardial infarction treatment

Linlin Fan#, Hua Qu#, Bo Wang#, Hong-zheng Li, Wen-wen Yang, Hao Guo, Shan-shan Zhang, Lin-zi Long, Yajun Liu, Gang Zhou, Chang-geng Fu\*, Jing Liu\*

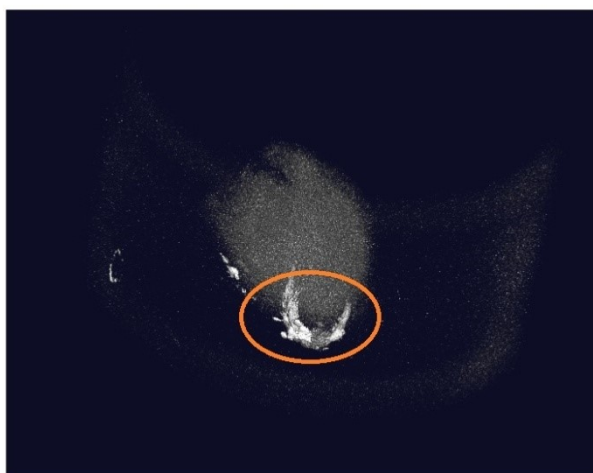

Figure S1. Reconstructed 3D images of CT scan in vitro after SA/LM/TA injection into the pericardial cavity of rat heart.

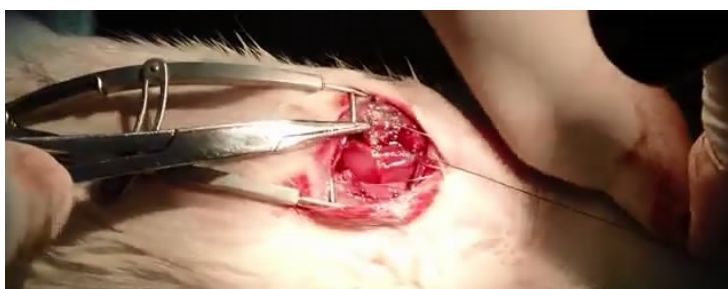

Figure S2. The construction of MI model on rat heart

**Before injection**

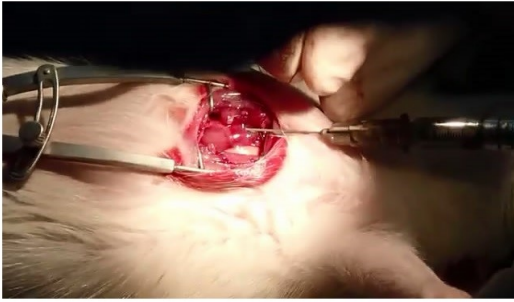

**After injection**

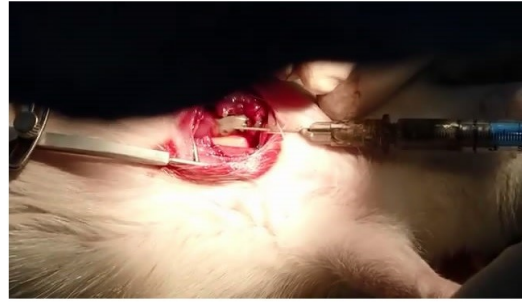

Figure S3. Before and after SA/LM/TA injection in pericardial cavity.
